# Supplementary material for: Biotransformation ofMomordica charantiafresh juice byLactobacillus plantarumBET003 and its putative anti-diabetic potential
Source: PeerJ journal article supplement (doi:10.7717/peerj.1376), 2015-10-29
Supplement: Bacteria_ID_Service_Report.pdf [file Bacteria_ID_Service_Report.pdf]

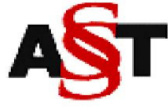

**All Special Shop Trading (SA-0148761-U)**

No. 51, Jalan SP 6/3, Bandar Saujana Putra  
42610 Lebuhraya ELITE, Selangor Darul Ehsan, MALAYSIA  
Tel/Fax: +603 7726 2810 Email: asst2010@yahoo.com

**Service Report**  
**Bacterial Identification By 16S rRNA Gene Sequencing**

Date: 01 April 2012

| No. | Sample ID | Comment                                                                                                                                               | Remarks                                                                                                                                                                                                                          |
|-----|-----------|-------------------------------------------------------------------------------------------------------------------------------------------------------|----------------------------------------------------------------------------------------------------------------------------------------------------------------------------------------------------------------------------------|
| 01. | Lac       | Bacterium "Lac" is closely related to <i>Lactobacillus plantarum</i> based on the 16S rRNA gene sequence similarity search and phylogenetic analysis. | Supplied data:<br>1. DNA Sequencing results<br>2. Assembled 16S rRNA gene sequence<br>3. Top 10 reported hits to the query<br>4. Multiple sequence alignment of 10 orthologous sequences and an outgroup<br>5. Phylogenetic tree |

Prepared by  
David Lee

---

\*The chromatogram is saved as \*ab1\* files. The recommended trace viewer is Sequence Scanner 1.0 from <http://www.appliedbiosystems.com/sequencescanner>

## Assembled 16S rRNA Gene Sequence

---

>Lac

GCCTAATACATGCAAGTCGAACGAACTCTGGTATTGATTGGTGCTTGCATCATGATTTACATTTGAGTGAGTGGCGAA  
CTGGTGAGTAACACGTGGGAAACCTGCCAGAAGCGGGGATAACACCTGGAAACAGATGCTAATACCGCATAACAA  
CTTGGACCGCATGGTCCGAGTTTGAAAGATGGCTTCGGCTACACTTTTGGATGGTCCCAGCGGCTATTAGCTAGATG  
GTGGGGTAACGGCTACCATGGCAATGATACGTAGCCGACCTGAGAGGGTAATCGCCACATTGGGACTGAGACACG  
GCCAAACTCTACGGGAGGCAGCAGTAGGGAATCTTCCACAATGGACGAAAGTCTGATGGAGCAACGCCGCGTGAG  
TGAAGAAGGGTTTCGGCTCGTAAAACCTCTGTTGTTAAAGAAGAACATATCTGAGAGTAACTGTTTCAGGTATTGACGGT  
ATTTAACCAGAAAGCCACGGCTAACTACGTGCCAGCAGCCGCGGTAATACGTAGGTGGCAAGCGTTGTCGGGATTTAT  
TGGGCGTAAAGCGAGCGCAGGCGGTTTTTAAAGTCTGATGTGAAAGCCTTCGGCTCAACCGAAGAAGTGCATCGGAA  
ACTGGGAAACTTGAGTGCAGAAGAGGACAGTGGAACTCCATGTGTAGCGGTGAAATGCGTAGATATATGGAAGAAC  
ACCAGTGGCGAAGGCGGCTGTCTGGTCTGTAAGTCTGTAAGTCTGTAAGTCTGTAAGTCTGTAAGTCTGTAAGTCTG  
CCCTGGTAGTCCATACCGTAAACGATGAATGCTAAGTCTGTAAGTCTGTAAGTCTGTAAGTCTGTAAGTCTGTAAGTCT  
AAGCATTCCGCTGGGAGTACGGCCGAAGGCTGAACTCAAAGGAATTGACGGGGGCCGACAAGCGGTGGAG  
CATGTGGTTAATTCGAAGCTACGCGAAGAACCTTACCAGTCTTGACATACTATGCAAATCTAAGAGATTAGACGTTT  
CCTTCGGGGACATGGATACAGGTGGTGCATGGTTGTCGTCAGCTCGTGTGAGATGTTGGGTTAAGTCCCAGCAAC  
GAGCGCAACCTTATTATCAGTTGCCAGCATTAAAGTGGGCACTCTGGTGGAGACTGCCGGTGACAAACCGGAGGAAG  
GTGGGGATGACGTCAAATCATCATGCCCTTATGACCTGGGCTACACACGTGCTACAATGGATGGTACAACGAGTTGC  
GAACTCGGAGAGTAAGCTAATCTCTTAAAGCCATTCTCAGTTCGGATTGTAGGCTGCAACTCGCCTACATGAAGTCG  
GAATCGTAGTAATCGCGGATCAGCATGCCGCGGTGAATACGTTCCCGGGCCTGTACACACCGCCGTCACACCATG  
AGAGTTTGTAAACCCAAAGTCGGTGGGGTAACTTTTAGGAACCAGCCGCTAAG

## The top 10 reported hits to the query 16S rRNA gene sequence

---

| Accession                  | Description                                                                                                                                  | Score     | E Value |
|----------------------------|----------------------------------------------------------------------------------------------------------------------------------------------|-----------|---------|
| <a href="#">JQ340030.1</a> | Lactobacillus plantarum strain R17 16S ribosomal RNA gene, partial sequence                                                                  | 2678 bits | 0.0     |
| <a href="#">AB690244.1</a> | Lactobacillus plantarum gene for 16S rRNA, partial sequence, strain: JCM 1100                                                                | 2678 bits | 0.0     |
| <a href="#">AL935263.2</a> | Lactobacillus plantarum WCFS1 complete genome                                                                                                | 2678 bits | 0.0     |
| <a href="#">FR775893.1</a> | Lactobacillus plantarum subsp. plantarum partial 16S rRNA gene, type strain CIP 103151T                                                      | 2678 bits | 0.0     |
| <a href="#">FR871789.1</a> | Lactobacillus pentosus MP-10 draft genome, annotated contig00046                                                                             | 2678 bits | 0.0     |
| <a href="#">HQ384301.1</a> | Lactobacillus pentosus strain 5-36 16S ribosomal RNA gene, partial sequence                                                                  | 2678 bits | 0.0     |
| <a href="#">GU552552.1</a> | Lactobacillus plantarum strain KW30 16S ribosomal RNA gene, complete sequence; and 16S-23S ribosomal RNA intergenic spacer, partial sequence | 2678 bits | 0.0     |
| <a href="#">AB603688.1</a> | Lactobacillus plantarum subsp. plantarum gene for 16S rRNA, partial sequence, strain: UB9                                                    | 2678 bits | 0.0     |
| <a href="#">AB603687.1</a> | Lactobacillus plantarum subsp. plantarum gene for 16S rRNA, partial sequence, strain: UB8                                                    | 2678 bits | 0.0     |
| <a href="#">AB603686.1</a> | Lactobacillus plantarum subsp. plantarum gene for 16S rRNA, partial sequence, strain: UA6                                                    | 2678 bits | 0.0     |

## Multiple Sequence Alignment of 10 Orthologous Sequences and an Outgroup

CLUSTAL 2.1 multiple sequence alignment

```

Lac -----GCCTAATACATGCAAGTCGAA 21
L.plantarum -----ACGCTGGCGGCGTGCCTAATACATGCAAGTCGAA 34
L.panisi -----GTGCCTAATACATGCAAGTCGAG 23
L.curvatus -----ACGAACGCTGGCGGCGTGCCTAATACATGCAAGTCGAA 38
L.intestinalis -----GGACGAACGCTGGCGGCGTGCCTAATACATGCAAGTCGAG 40
L.crispatus GAGAGTTTGATCCTGGCTCAGGACGAACGCTGGCGGCGTGCCTAATACATGCAAGTCGAG 60
L.casei -----GATGAACGCTGGCGGCGTGCCTAATACATGCAAGTCGAA 39
L.kunkeei -----GACGAACGCTGGCGGCGTGCCTAATACATGCAAGTCGAA 39
L.zeae -----GATGAACGCTGGCGGCGTGCCTAATACATGCAAGTCGAA 39
L.salivarius -----GACGAACGCTGGCGGCGTGCCTAATACATGCAAGTCGAA 39
Bacillus-lentus -AGAGTTTGATCCTGGCTCAGGACGAACGCTGGCGGCGTGCCTAATACATGCAAGTCGAG 59
                    *****

Lac CGAA-CTCTGGTA--TTGATTG-G--TGCTTGATCA-TGAT---TTAC--ATTG-AG 67
L.plantarum CGAA-CTCTGGTA--TTGATTG-G--TGCTTGATCA-TGAT---TTAC--ATTG-AG 80
L.panisi CGCA-CTGGCCAA-CTGATATGACGTGCTTGCACT---GATTGACGATGATTACCAG 78
L.curvatus CGCA-CT---CTCGTTAGATTGAAGAAGCTTGCTTCT--GATT-GATAACATTTGA---G 88
L.intestinalis CGAG-CTGAACCAG-CAGATTCA-----CTTCGGT---GAT--GACGCTGGGA-AC--G 84
L.crispatus CGAG-CTTGCCTAGATGAATTTGG--TGCTTGACCA--GAT--GAACTAGAT-ACAAG 112
L.casei CGAG-TT---TTGG-TCGATGAACGGTGTGCACTG-WGAT-----TTRACTTAAAA 86
L.kunkeei CGAG-CTCTCCAAATTGATTTTA--TGCTTGATAAATGAT---TTTTGGATTCCGGAG 92
L.zeae CGAG-TT---TTGG-TCGATGAACGGTGTGCACTG-TGAT-----TCAACTTAAAA 86
L.salivarius CGAACTTTCTTACACCGA-----ATGCTTGCAATC---ACC-----GTAAGAAG 81
Bacillus-lentus CGAA-----TGGATGGGA--GCTTGTCTCC-----AGAAAG 87
                    **          *          ***

Lac T-GAGTGGCGAAGTGGTGAAGTAAACACGTGGGAAACCTGCCAGAAAGCGGGGGATAACACC 126
L.plantarum T-GAGTGGCGAAGTGGTGAAGTAAACACGTGGGAAACCTGCCAGAAAGCGGGGGATAACACC 139
L.panisi T-GAGCGGCGGACGGGTGAGTAAACACGTGGGCAACCTGCCCTAAAGCGGGGGATAACATT 137
L.curvatus T-GAGTGGCGGACGGGTGAGTAAACACGTGGGTAACCTGCCCTAAAGTGGGGGATAACATT 147
L.intestinalis C-GAGCGGCGGATGGGTGAGTAAACACGTGGGTAACCTGCCCTAAAGTCTGGGATACCCT 143
L.crispatus C-GAGCGGCGGATGGGTGAGTAAACACGTGGGAAACCTGCCCTAGTCTGGGATACCCT 171
L.casei C-GAGTGGCGGACGGGTGAGTAAACACGTGGGTAACCTGCCCTTAAGTGGGGGATAACATT 145
L.kunkeei C-GAGTGGCGAAGTGGTGAAGTAAACACGTGGGTAACCTGCCCGAAGCGGGGGATAACATT 151
L.zeae C-GAGTGGCGGACGGGTGAGTAAACACGTGGGTAACCTGCCCTTAAGTGGGGGATAACATT 145
L.salivarius TTGAGTGGCGGACGGGTGAGTAAACACGTGGGTAACCTGCCCTAAAGAAAGGGGATAACATT 141
Bacillus-lentus T-TAGCGGCGGACGGGTGAGTAAACACGTGGGCAACCTACCTGTAAGACTGGGATAACTTC 146
                    ** **** * ***** ***** ** ** ***** *

Lac TGGAAACAGATGCTAATACCGCATAAACAATTGGA-CCGCATGGTCCGAGTTTGAAGAT 185
L.plantarum TGGAAACAGATGCTAATACCGCATAAACAATTGGA-CCGCATGGTCCGAGTTTGAAGAT 198
L.panisi TGGAAACAGGTGCTAATACCGCATAAATACGAAAACC-ACATGGTTTTCGTATAAAAGAT 196
L.curvatus TGGAAACAGATGCTAATACCGCATAAACAATTAGCACC-GCATGGTGAAGTTTGAAGAT 206
L.intestinalis TGGAAACAGGTGCTAATACCGGATAAACAACAATAGCT-GCATGGCTATTGCTTAAAGGC 202
L.crispatus TGGAAACAGGTGCTAATACCGGATAAAGAACAATAGATCGCATGATCAGCTTTTAAAGGC 231
L.casei TGGAAACAGATGCTAATACCGCATAAATCCAAGAACC-GCATGGTCTTGGCTGAAAGAT 204
L.kunkeei TGGAAACAAGTGTCTAATACCGCATAAATAGTTGGAACCGCATGGTTCCAATTGAAAGAT 211
L.zeae TGGAAACAGATGCTAATACCGCATAAATCCAAGAACC-GCATGGTCTTGGCTGAAAGAT 204
L.salivarius TGGAAACAGGTGCTAATACCGTATATCTTAAGGATC-GCATGATCCTTAGATGAAAGAT 200
Bacillus-lentus GGGAAACCGGAGCTAATACCGGATAACTTCTTCTTC-TCCTGGAGAAAGTTGAAAGAC 205
                    ***** ***** ** ** * ** * ****

Lac GGCTT-CGGCTATCACTTTTGGATGGTCCCGCGGCGTATTAGCTAGATGGTGGGGTAACG 244
L.plantarum GGCTT-CGGCTATCACTTTTGGATGGTCCCGCGGCGTATTAGCTAGATGGTGGGGTAACG 257
L.panisi GGTTC-CGGCTATCACTTTAGGATGGGCCCGCGGTGCATTAGCTAGTTGGTAGGGTAACG 255
L.curvatus GGTTC-CGGCTATCACTTTAGGATGGACCCGCGGTGCATTAGTTAGTTGGTAGGGTAAAG 265
L.intestinalis GGCCT-AAGCTGTCTGCTAAAGGATGGACCCGCGGTGCATTAGCTAGTTGGTAGGGTAAAG 261
L.crispatus GCGCT-AAGCTGTCTGCTATGGGATGGCCCCGCGGTGCATTAGCTAGTTGGTAGGGTAAAG 290
L.casei GGCCTCAAGCTATCGCTTTTGGATGGACCCGCGGCGTATTAGCTAGTTGGTAGGGTAAAG 264
L.kunkeei GGCTC-TG-CTATCACTTTTGGATGGACCCGCGGCGTATTAGTTAGTTGGTAGGGTAAAG 269
L.zeae GGCCT-AAGCTATCGCTTTTGGATGGACCCGCGGCGTATTAGCTAGTTGGTAGGGTAAAG 263
L.salivarius GGTTT--TGCTATCGCTTTTAGATGGACCCGCGGCGTATTAGTTAGTTGGTAGGGTAAAG 258
Bacillus-lentus GGCTT-CGGCTGTCACTTACAGATGGGCCCGCGGCGTATTAGCTAGTTGGTAGGGTAAAG 264
                    **          * * * * *          * * * * *          * * * * *

```

|                 |                                                                |     |
|-----------------|----------------------------------------------------------------|-----|
| Lac             | GCTCACCATGGCAATGATACGTAGCCGACCTGAGAGGGTAATCGGCCACATTGGGACTGA   | 304 |
| L.plantarum     | GCTCACCATGGCAATGATACGTAGCCGACCTGAGAGGGTAATCGGCCACATTGGGACTGA   | 317 |
| L.panisi        | GCTTACCAAGGCAATGATGATAGCCGAGTTGAGAGACTGATCGGCCACAATGGAACTGA    | 315 |
| L.curvatus      | GCTCACCAGACCGTGATGCATAGCCGACCTGAGAGGGTAATCGGCCACACTGGGACTGA    | 325 |
| L.intestinalis  | GCTTACCAAGGCGACGATGCATAGCCGAGTTGAGAGACTGATCGGCCACATTGGGACTGA   | 321 |
| L.crispatus     | GCTTACCAAGGCGATGATGCATAGCCGAGTTGAGAGACTGATCGGCCACATTGGGACTGA   | 350 |
| L.casei         | GCTCACCAGGCGATGATGATAGCCGAACTGAGAGGTTGATCGGCCACATTGGGACTGA     | 324 |
| L.kunkeei       | GCCACCAAGACGATGATACGTAGCCGACCTGAGAGGGTAATCGGCCACATTGGGACTGA    | 329 |
| L.zeae          | GCTCACCAGGCGATGATACGTAGCCGAACTGAGAGGTTGATCGGCCACATTGGGACTGA    | 323 |
| L.salivarius    | GCCTACCAAGGTGATGATACGTAGCCGAACTGAGAGGTTGATCGGCCACATTGGGACTGA   | 318 |
| Bacillus-lentus | GCTCACCAGGCAACGATGCGTAGCCGACCTGAGAGGGTATCGGCCACACTGGGACTGA     | 324 |
|                 | ** * * * *                                                     |     |
| Lac             | GACACGGCCCAAACCTCTACGGGAGGCAGCAGTAGGGAATCTTCCACAATGGACGAAAGT   | 364 |
| L.plantarum     | GACACGGCCCAAACCTCTACGGGAGGCAGCAGTAGGGAATCTTCCACAATGGACGAAAGT   | 377 |
| L.panisi        | GACACGGTCCATACTCTACGGGAGGCAGCAGTAGGGAATCTTCCACAATGGGCGCAAGC    | 375 |
| L.curvatus      | GACACGGCCCAAGACTCTACGGGAGGCAGCAGTAGGGAATCTTCCACAATGGACGAAAGT   | 385 |
| L.intestinalis  | GACACGGCCCAAACCTCTACGGGAGGCAGCAGTAGGGAATCTTCCACAATGGGCGAAAGC   | 381 |
| L.crispatus     | GACACGGCCCAAACCTCTACGGGAGGCAGCAGTAGGGAATCTTCCACAATGGACGCAAGT   | 410 |
| L.casei         | GACACGGCCCAAACCTCTACGGGAGGCAGCAGTAGGGAATCTTCCACAATGGACGCAAGT   | 383 |
| L.kunkeei       | GACACGGCCCAAGACTCTCTACGGGAGGCAGCAGTAGGGAATCTTCCACAATGGACGAAAGT | 389 |
| L.zeae          | GACACGGCCCAAACCTCTACGGGAGGCAGCAGTAGGGAATCTTCCACAATGGACGCAAGT   | 383 |
| L.salivarius    | GACACGGCCCAAACCTCTACGGGAGGCAGCAGTAGGGAATCTTCCACAATGGACGCAAGT   | 378 |
| Bacillus-lentus | GACACGGCCCAAGACTCTCTACGGGAGGCAGCAGTAGGGAATCTTCCACAATGGACGAAAGT | 384 |
|                 | ***** * * * * *                                                |     |
| Lac             | CTGATGGAGCAACGCCGCGTGAGTGAAGAAGGTTTTCGGCTCGTAAAACTCTGTTGTTAA   | 424 |
| L.plantarum     | CTGATGGAGCAACGCCGCGTGAGTGAAGAAGGTTTTCGGCTCGTAAAACTCTGTTGTTAA   | 437 |
| L.panisi        | CTGATGGAGCAACGCCGCGTGAGTGAAGAAGGTTTTCGGCTCGTAAAACTCTGTTGTTAA   | 435 |
| L.curvatus      | CTGATGGAGCAACGCCGCGTGAGTGAAGAAGGTTTTCGGATCGTAAAACTCTGTTGTTGG   | 445 |
| L.intestinalis  | CTGATGGAGCAACGCCGCGTGAGTGAAGAAGGTTTTCGGATCGTAAAGCTCTGTTGTTGG   | 441 |
| L.crispatus     | CTGATGGAGCAACGCCGCGTGAGTGAAGAAGGTT--TCGGCTCGTAAAGCTCTGTTGGTAG  | 468 |
| L.casei         | CTGATGGAGCAACGCCGCGTGAGTGAAGAAGGTTTTCGGCTCGTAAAACTCTGTTGTTGG   | 443 |
| L.kunkeei       | CTGATGGAGCAACGCCGCGTGAGTGAAGAAGGTTTTCGGATCGTAAAACTCTGTTGTTAA   | 449 |
| L.zeae          | CTGATGGAGCAACGCCGCGTGAGTGAAGAAGGTTTTCGGCTCGTAAAACTCTGTTGTTGG   | 443 |
| L.salivarius    | CTGATGGAGCAACGCCGCGTGAGTGAAGAAGGTTTTCGGATCGTAAAACTCTGTTGTTAG   | 438 |
| Bacillus-lentus | CTGACGGAGCAACGCCGCGTGAGTGAAGAAGGTTTTCGGATCGTAAAACTCTGTTATCAG   | 444 |
|                 | ***** * * * * *                                                |     |
| Lac             | AGAAGAACATATCTGAGAGTAACCTGTTTCAGGTATTGACGGTATTTAACCGAAAAGCCACG | 484 |
| L.plantarum     | AGAAGAACATATCTGAGAGTAACCTGTTTCAGGTATTGACGGTATTTAACCGAAAAGCCACG | 497 |
| L.panisi        | AGAAGAACGTCGCTGAGAGTAACCTGTTTCATGCAGTGACGGTATTTAACCGAAAAGTCACG | 495 |
| L.curvatus      | AGAAGAACGATTTGATAGTAACCTGATCAGGTAGTGACGGTATTTAACCGAAAAGCCACG   | 505 |
| L.intestinalis  | TGAAGAAGGATAGAGGTAGTAACCTGCCCCTATTTGACGGTAATCAACCAGAAAAGTCACG  | 501 |
| L.crispatus     | TGAAGAAGGATAGAGGTAGTAACCTGCCCCTATTTGACGGTAATCAACCAGAAAAGTCACG  | 528 |
| L.casei         | AGAAGAATGTCGGCAGAGTAACCTGTTGTCGGCGTGACGGTATTTAACCGAAAAGCCACG   | 503 |
| L.kunkeei       | AGAAGAACAAGTGTAGAGTAACCTGTTAACCTTTGACGGTATTTAACCGAAAAGCCACG    | 509 |
| L.zeae          | AGAAGAATGTCGGCAGAGTAACCTGTTGTCGGCGTGACGGTATTTAACCGAAAAGCCACG   | 503 |
| L.salivarius    | AGAAGAACACGAGTGAGAGTAACCTGTTTCATTCGATGACGGTATTTAACCGCAAGTCACG  | 498 |
| Bacillus-lentus | GGAAGAACAAGTATCGGAGTAACCTGCCGTTACCTTGACGGTACCTGACCGAAAAGCCACG  | 504 |
|                 | ***** * * * * *                                                |     |
| Lac             | GCTAACTACGTGCCAGCAGCCGCGGTAATACGTAGGTGGCAAGCGTTGTCCGGATTATT    | 544 |
| L.plantarum     | GCTAACTACGTGCCAGCAGCCGCGGTAATACGTAGGTGGCAAGCGTTGTCCGGATTATT    | 557 |
| L.panisi        | GCTAACTACGTGCCAGCAGCCGCGGTAATACGTAGGTGGCAAGCGTTATCCGGATTATT    | 555 |
| L.curvatus      | GCTAACTACGTGCCAGCAGCCGCGGTAATACGTAGGTGGCAAGCGTTGTCCGGATTATT    | 565 |
| L.intestinalis  | GCTAACTACGTGCCAGCAGCCGCGGTAATACGTAGGTGGCAAGCGTTGTCCGGATTATT    | 561 |
| L.crispatus     | GCTAACTACGTGCCAGCAGCCGCGGTAATACGTAGGTGGCAAGCGTTGTCCGGATTATT    | 588 |
| L.casei         | GCTAACTACGTGCCAGCAGCCGCGGTAATACGTAGGTGGCAAGCGTTATCCGGATTATT    | 563 |
| L.kunkeei       | GCTAACTACGTGCCAGCAGCCGCGGTAATACGTAGGTGGCAAGCGTTGTCCGGATTATT    | 569 |
| L.zeae          | GCTAACTACGTGCCAGCAGCCGCGGTAATACGTAGGTGGCAAGCGTTATCCGGATTATT    | 563 |
| L.salivarius    | GCTAACTACGTGCCAGCAGCCGCGGTAATACGTAGGTGGCAAGCGTTGTCCGGATTATT    | 558 |
| Bacillus-lentus | GCTAACTACGTGCCAGCAGCCGCGGTAATACGTAGGTGGCAAGCGTTGTCCGGATTATT    | 564 |
|                 | ***** * * * * *                                                |     |

Lac GGGCGTAAAGCGAGCGCAGGCGGTTTTTAAAGTCTGATGTGAAAGCCTTCGGCTCAACCG 604  
L.plantarum GGGCGTAAAGCGAGCGCAGGCGGTTTTTAAAGTCTGATGTGAAAGCCTTCGGCTCAACCG 617  
L.panisi GGGCGTAAAGCGAGCGCAGGCGGTTTCTTAGTCTGATGTGAAAGCCTTCGGCTTAACCG 615  
L.curvatus GGGCGTAAAGCGAGCGCAGGCGGTTTTCTTAGTCTGATGTGAAAGCCTTCGGCTCAACCG 625  
L.intestinalis GGGCGTAAAGCGAGCGCAGGCGGAAAGATAAGTCTGATGTGAAAGCCCCCGCTTAACCG 621  
L.crispatus GGGCGTAAAGCGAGCGCAGGCGGTTCAATAAGTCTGATGTGAAAGCCTTCGGCTTAACCG 648  
L.casei GGGCGTAAAGCGAGCGCAGGCGGTTTTTAAAGTCTGATGTGAAAGCCTTCGGCTTAACCG 623  
L.kunkeei GGGCGTAAAGCGAGCGCAGGCGGTTTTGTAAGTCTGCTGTGAAAGCCTTCAGCTCAACTG 629  
L.zeae GGGCGTAAAGCGAGCGCAGGCGGTTTTTAAAGTCTGATGTGAAAGCCTTCGGCTTAACCG 623  
L.salivarius GGGCGTAAAGGGAACGCAGGCGGTTTTTAAAGTCTGATGTGAAAGCCTTCGGCTTAACCG 618  
Bacillus-lentus GGGCGTAAAGCGCGCAGGCGGTTTTCTTAGTCTGATGTGAAAGCCCCACGCTCAACCG 624  
\*\*\*\*\* \* \*\*\*\*\* \*\* \*\*\*\*\* \*\*\*\*\* \* \*\* \* \*\* \*

Lac AAGAAGTGCATCGGAACTGGGAACTTGAGTGCAGAAGAGGACAGTGAACCTCCATGTG 664  
L.plantarum AAGAAGTGCATCGGAACTGGGAACTTGAGTGCAGAAGAGGACAGTGAACCTCCATGTG 677  
L.panisi AAGAAGTGCATCGGAAACCGGGCGACTTGAGTGCAGAAGAGGACAGTGAACCTCCATGTG 675  
L.curvatus AAGAAGTGCATCGGAACTGGGAACTTGAGTGCAGAAGAGGACAGTGAACCTCCATGTG 685  
L.intestinalis AGGAATTGCATCGGAACTGTGTTTTCTTAGTGCAGAAGAGGAGAGTGAACCTCCATGTG 681  
L.crispatus GAGAATTGCATCGGAACTGTGAACTTGAGTGCAGAAGAGGAGAGTGAACCTCCATGTG 708  
L.casei AGGAAGCGCATCGGAACTGGGAACTTGAGTGCAGAAGAGGACAGTGAACCTCCATGTG 683  
L.kunkeei AGGAAGTGCATCGGAACTACAAACTTGAGTGCAGAAGAGGAAAGTGAACCTCCATGTG 689  
L.zeae AGGAAGCGCATCGGAACTGGGAACTTGAGTGCAGAAGAGGACAGTGAACCTCCATGTG 683  
L.salivarius GAGTAGTGCATGGGAACTGGGAACTTGAGTGCAGAAGAGGAGAGTGAACCTCCATGTG 678  
Bacillus-lentus TGGAAGTGCATGGGAACTGGGAGACTTGAGTGCAGAAGAGGAGGCGGAATCCACGTG 684  
\* \* \*\* \*\*\*\*\* \*\*\*\*\* \*\*\*\*\* \* \*\* \* \*\* \* \*\* \*

Lac TAGCGGTGAAATGCGTAGATATATGGAAGAACCAGTGGCGAAGGCGGCTGTCTGGTCT 724  
L.plantarum TAGCGGTGAAATGCGTAGATATATGGAAGAACCAGTGGCGAAGGCGGCTGTCTGGTCT 737  
L.panisi TAGCGGTGAAATGCGTAGATATATGGAAGAACCAGTGGCGAAGGCGGCTGTCTGGTCT 735  
L.curvatus TAGCGGTGAAATGCGTAGATATATGGAAGAACCAGTGGCGAAGGCGGCTGTCTGGTCT 745  
L.intestinalis TAGCGGTGAAATGCGTAGATATATGGAAGAACCAGTGGCGAAGGCGGCTGTCTGGTCT 741  
L.crispatus TAGCGGTGAAATGCGTAGATATATGGAAGAACCAGTGGCGAAGGCGGCTGTCTGGTCT 768  
L.casei TAGCGGTGAAATGCGTAGATATATGGAAGAACCAGTGGCGAAGGCGGCTGTCTGGTCT 743  
L.kunkeei TAGCGGTGAAATGCGTAGATATATGGAAGAACCAGTGGCGAAGGCGGCTTTCTGGTCT 749  
L.zeae TAGCGGTGAAATGCGTAGATATATGGAAGAACCAGTGGCGAAGGCGGCTGTCTGGTCT 743  
L.salivarius TAGCGGTGAAATGCGTAGATATATGGAAGAACCAGTGGCGAAGGCGGCTGTCTGGTCT 738  
Bacillus-lentus TAGCGGTGAAATGCGTAGATATGGAAGAACCAGTGGCGAAGGCGGCTTTCTGGTCT 744  
\*\*\*\*\* \*\*\*\*\* \*\* \* \*\* \*\*\*\*\* \*\*\*\*\* \*\*\*\*\* \* \*\* \* \*\* \*

Lac GTAACCTGACGCTGAGGCTCGAAAGCATGGGTAGCAAAACAGGATTAGATACCTGGTAGTC 784  
L.plantarum GTAACCTGACGCTGAGGCTCGAAAGCATGGGTAGCAAAACAGGATTAGATACCTGGTAGTC 797  
L.panisi GCAACTGACGCTGAGGCTCGAAAGCATGGGTAGCAAAACAGGATTAGATACCTGGTAGTC 795  
L.curvatus GTAACCTGACGCTGAGGCTCGAAAGCATGGGTAGCAAAACAGGATTAGATACCTGGTAGTC 805  
L.intestinalis GTAACCTGACGCTGAGGCTCGAAAGCATGGGTAGCAAAACAGGATTAGATACCTGGTAGTC 801  
L.crispatus GCAACTGACGCTGAGGCTCGAAAGCATGGGTAGCAAAACAGGATTAGATACCTGGTAGTC 828  
L.casei GTAACCTGACGCTGAGGCTCGAAAGCATGGGTAGCAAAACAGGATTAGATACCTGGTAGTC 803  
L.kunkeei GTTACTGACGCTGAGGCTCGAAAGCATGGGTAGCAAAACAGGATTAGATACCTGGTAGTC 809  
L.zeae GTAACCTGACGCTGAGGCTCGAAAGCATGGGTAGCAAAACAGGATTAGATACCTGGTAGTC 803  
L.salivarius GTAACCTGACGCTGAGGCTCGAAAGCATGGGTAGCAAAACAGGATTAGATACCTGGTAGTC 798  
Bacillus-lentus GTAACCTGACGCTGAGGCTCGAAAGCATGGGTAGCAAAACAGGATTAGATACCTGGTAGTC 804  
\* \*\*\*\*\* \*\*\*\*\* \*\* \* \*\* \*\*\*\*\* \*\*\*\*\* \*\*\*\*\* \*\*\*\*\* \*

Lac CATAACCGTAAACGATGAATGCTAAGTGTGGAGGGTTTCCGCCCTTCAGTGTGCAGCTA 844  
L.plantarum CATAACCGTAAACGATGAATGCTAAGTGTGGAGGGTTTCCGCCCTTCAGTGTGCAGCTA 857  
L.panisi CATGCCGTAAACGATGAGTGTAGGTGTGGAGGGTTTCCGCCCTTCAGTGTGCAGCTA 855  
L.curvatus CATGCCGTAAACGATGAGTGTAGGTGTGGAGGGTTTCCGCCCTTCAGTGTGCAGCTA 865  
L.intestinalis CATGCCGTAAACGATGAGTGTAGGTGTGGAGGGTTTCCGCCCTTCAGTGTGCAGCTA 861  
L.crispatus CATGCCGTAAACGATGAGTGTAGGTGTGGAGGGTTTCCGCCCTTCAGTGTGCAGCTA 888  
L.casei CATGCCGTAAACGATGAATGCTAAGTGTGGAGGGTTTCCGCCCTTCAGTGTGCAGCTA 863  
L.kunkeei CATGCCGTAAACGATGAATGCTAAGTGTGGAGGGTTTCCGCCCTTCAGTGTGCAGCTA 869  
L.zeae CATGCCGTAAACGATGAATGCTAAGTGTGGAGGGTTTCCGCCCTTCAGTGTGCAGCTA 863  
L.salivarius CACGCCGTAAACGATGAATGCTAAGTGTGGAGGGTTTCCGCCCTTCAGTGTGCAGCTA 858  
Bacillus-lentus CACGCCGTAAACGATGAGTGTAGGTGTGGAGGGTTTCCGCCCTTCAGTGTGCAGCTA 864  
\*\* \*\*\*\*\* \*\*\*\*\* \* \*\* \* \*\* \* \*\*\*\*\* \*\*\*\*\* \* \*\* \* \*\* \*

Lac ACGCATTAAAGCATTCCGCCTGGGGAGTACGGCCGCAAGGCTGAAACTCAAAGGAATTGAC 904  
L.plantarum ACGCATTAAAGCATTCCGCCTGGGGAGTACGGCCGCAAGGCTGAAACTCAAAGGAATTGAC 917  
L.panis ACGCATTAAAGCATTCCGCCTGGGGAGTACGGCCGCAAGGTTGAAACTCAAAGGAATTGAC 915  
L.curvatus ACGCATTAAAGCATTCCGCCTGGGGAGTACGGCCGCAAGGTTGAAACTCAAAGGAATTGAC 925  
L.intestinalis ACGCATTAAAGCATTCCGCCTGGGGAGTACGGCCGCAAGGTTGAAACTCAAAGGAATTGAC 921  
L.crispatus ACGCATTAAAGCATTCCGCCTGGGGAGTACGGCCGCAAGGTTGAAACTCAAAGGAATTGAC 948  
L.casei ACGCATTAAAGCATTCCGCCTGGGGAGTACGGCCGCAAGGTTGAAACTCAAAGGAATTGAC 923  
L.kunkeei ACGCATTAAAGTATTCCGCCTGGGGAGTACGGCCGCAAGGTTGAAACTCAAAGGAATTGAC 929  
L.zeae ACGCATTAAAGCATTCCGCCTGGGGAGTACGGCCGCAAGGTTGAAACTCAAAGGAATTGAC 923  
L.salivarius ACGCAATAAGCATTCCGCCTGGGGAGTACGGCCGCAAGGTTGAAACTCAAAGGAATTGAC 918  
Bacillus-lentus ACGCATTAAAGCATTCCGCCTGGGGAGTACGGCCGCAAGGCTGAAACTCAAAGGAATTGAC 924  
\*\*\*\*\*

Lac GGGGGCCCGCACAAGCGGTGGAGCATGTGGTTAATTTCGAAGCTACGCGAAGAACCTTAC 964  
L.plantarum GGGGGCCCGCACAAGCGGTGGAGCATGTGGTTAATTTCGAAGCTACGCGAAGAACCTTAC 977  
L.panis GGGGGCCCGCACAAGCGGTGGAGCATGTGGTTAATTTCGAAGCTACGCGAAGAACCTTAC 975  
L.curvatus GGGGGCCCGCACAAGCGGTGGAGCATGTGGTTAATTTCGAAGCAACGCGAAGAACCTTAC 985  
L.intestinalis GGGGGCCCGCACAAGCGGTGGAGCATGTGGTTAATTTCGAAGCAACGCGAAGAACCTTAC 981  
L.crispatus GGGGGCCCGCACAAGCGGTGGAGCATGTGGTTAATTTCGAAGCAACGCGAAGAACCTTAC 1008  
L.casei GGGGGCCCGCACAAGCGGTGGAGCATGTGGTTAATTTCGAAGCAACGCGAAGAACCTTAC 983  
L.kunkeei GGGGGCCCGCACAAGTGGTGGAGCATGTGGTTAATTTCGATGCTACGCGAAGAACCTTAC 989  
L.zeae GGGGGCCCGCACAAGCGGTGGAGCATGTGGTTAATTTCGAAGCAACGCGAAGAACCTTAC 983  
L.salivarius GGGGGCCCGCACAAGCGGTGGAGCATGTGGTTAATTTCGAAGCAACGCGAAGAACCTTAC 978  
Bacillus-lentus GGGGGCCCGCACAAGCGGTGGAGCATGTGGTTAATTTCGAAGCAACGCGAAGAACCTTAC 984  
\*\*\*\*\*

Lac CAGGTCTTGACATACTATGCAAACTAAGAGATTAGA-CGTTCCTTCGGGG-ACATGGA 1022  
L.plantarum CAGGTCTTGACATACTATGCAAACTAAGAGATTAGA-CGTTCCTTCGGGG-ACATGGA 1035  
L.panis CAGGTCTTGACATCTTGCGCTAACCTAAGAGATTAGG-CGTTCCTTCGGGG-ACG-CAA 1032  
L.curvatus CAGGTCTTGACATCTTTGACCACTCTAGAGATAGAG-CTTTCCTTCGGGG-ACA-AAG 1042  
L.intestinalis CAGGTCTTGACATCTAGTGCCATCTAAGAGATTAGG-AGTTCCTTCGGGG-ACG-CTA 1038  
L.crispatus CAGGTCTTGACATCTAGTGCCATTTGTAGAGATACAA-AGTTCCTTCGGGG-ACG-CTA 1065  
L.casei CAGGTCTTGACATCTTTGATCACCTGAGAGATCAGG-TTTCCTTCGGGG-GCA-AAA 1040  
L.kunkeei CAGGTCTTGACATCTTTGATCACCTGAGAGATCAGG-TTTCCTTCGGGG-ACA-GAA 1046  
L.zeae CAGGTCTTGACATCTTTGATCACCTGAGAGATCAGG-TTTCCTTCGGGG-GCA-AAA 1040  
L.salivarius CAGGTCTTGACATCTTTGATCACCTAAGAGATTAGG-CTTTCCTTCGGGG-ACA-AAG 1035  
Bacillus-lentus CAGGTCTTGACATCTCTGACCACCCTAGAGATAGGGACTTCCCTTCGGGGGACA-GAG 1043  
\*\*\*

Lac T-ACAGGTGGTGCATGGTTGTCGTCAGCTCGTGTGAGATGTTGGGTTAAGTCCCGCA 1081  
L.plantarum T-ACAGGTGGTGCATGGTTGTCGTCAGCTCGTGTGAGATGTTGGGTTAAGTCCCGCA 1094  
L.panis TGACAGGTGGTGCATGGTTGTCGTCAGCTCGTGTGAGATGTTGGGTTAAGTCCCGCA 1092  
L.curvatus TGACAGGTGGTGCATGGTTGTCGTCAGCTCGTGTGAGATGTTGGGTTAAGTCCCGCA 1102  
L.intestinalis AGACAGGTGGTGCATGGTGTGTCGTCAGCTCGTGTGAGATGTTGGGTTAAGTCCCGCA 1098  
L.crispatus AGACAGGTGGTGCATGGTGTGTCGTCAGCTCGTGTGAGATGTTGGGTTAAGTCCCGCA 1125  
L.casei TGACAGGTGGTGCATGGTTGTCGTCAGCTCGTGTGAGATGTTGGGTTAAGTCCCGCA 1100  
L.kunkeei TGACAGGTGGTGCATGGTTGTCGTCAGCTCGTGTGAGATGTTGGGTTAAGTCCCGCA 1106  
L.zeae TGACAGGTGGTGCATGGTTGTCGTCAGCTCGTGTGAGATGTTGGGTTAAGTCCCGCA 1100  
L.salivarius TGACAGGTGGTGCATGGTGTGTCGTCAGCTCGTGTGAGATGTTGGGTTAAGTCCCGCA 1095  
Bacillus-lentus TGACAGGTGGTGCATGGTTGTCGTCAGCTCGTGTGAGATGTTGGGTTAAGTCCCGCA 1103  
\*\*\*\*\*

Lac ACGAGCGCAACCCCTTATTACAGTTGCCAGCATTAAAGTTGGGCACTCTAGTGGAGACTGCC 1141  
L.plantarum ACGAGCGCAACCCCTTATTACAGTTGCCAGCATTAAAGTTGGGCACTCTAGTGGAGACTGCC 1154  
L.panis ACGAGCGCAACCCCTTATTACAGTTGCCAGCATTAAAGTTGGGCACTCTAGTGGAGACTGCC 1152  
L.curvatus ACGAGCGCAACCCCTTATTACAGTTGCCAGCATTAAAGTTGGGCACTCTAGTGGAGACTGCC 1162  
L.intestinalis ACGAGCGCAACCCCTTATTACAGTTGCCAGCATTAAAGTTGGGCACTCTAATGAGACTGCC 1158  
L.crispatus ACGAGCGCAACCCCTTATTACAGTTGCCAGCATTAAAGTTGGGCACTCTAATGAGACTGCC 1185  
L.casei ACGAGCGCAACCCCTTATTACAGTTGCCAGCATTAAAGTTGGGCACTCTAGTAAAGACTGCC 1160  
L.kunkeei ACGAGCGCAACCCCTTATTACAGTTGCCAGCATTAAAGTTGGGCACTCTAGTGGAGACTGCC 1166  
L.zeae ACGAGCGCAACCCCTTATTACAGTTGCCAGCATTAAAGTTGGGCACTCTAGTAAAGACTGCC 1160  
L.salivarius ACGAGCGCAACCCCTTATTACAGTTGCCAGCATTAAAGTTGGGCACTCTAGTGGAGACTGCC 1155  
Bacillus-lentus ACGAGCGCAACCCCTTAACTTACAGTTGCCAGCATTAAAGTTGGGCACTCTAAGGTGACTGCC 1163  
\*\*\*\*\*

|                 |                                                                |      |
|-----------------|----------------------------------------------------------------|------|
| Lac             | GGTGACAAACCGGAGGAAGGTGGGGATGACGTCAAATCATCATGCCCTTATGACCTGGG    | 1201 |
| L.plantarum     | GGTGACAAACCGGAGGAAGGTGGGGATGACGTCAAATCATCATGCCCTTATGACCTGGG    | 1214 |
| L.panisi        | GGTGACAAACCGGAGGAAGGTGGGGACGACGTCAAGTCATCATGCCCTTATGACCTGGG    | 1212 |
| L.curvatus      | GGTGACAAACCGGAGGAAGGTGGGGACGACGTCAAATCATCATGCCCTTATGACCTGGG    | 1222 |
| L.intestinalis  | GGTGACAAACCGGAGGAAGGTGGGGATGACGTCAAAGTCATCATGCCCTTATGACCTGGG   | 1218 |
| L.crispatus     | GGTGACAAACCGGAGGAAGGTGGGGATGACGTCAAAGTCATCATGCCCTTATGACCTGGG   | 1245 |
| L.casei         | GGTGACAAACCGGAGGAAGGTGGGGATGACGTCAAATCATCATGCCCTTATGACCTGGG    | 1220 |
| L.kunkeei       | GGTGATAAACCGGAGGAAGGTGGGGACGACGTCAAATCATCATGCCCTTATGAGCTGGG    | 1226 |
| L.zeae          | GGTGACAAACCGGAGGAAGGTGGGGATGACGTCAAATCATCATGCCCTTATGACCTGGG    | 1220 |
| L.salivarius    | GGTGACAAACCGGAGGAAGGTGGGGACGACGTCAAAGTCATCATGCCCTTATGACCTGGG   | 1215 |
| Bacillus-lentus | GGTGACAAACCGGAGGAAGGTGGGGATGACGTCAAATCATCATGCCCTTATGACCTGGG    | 1223 |
|                 | *****                                                          |      |
| Lac             | CTACACACGTGCTACAATGGATGGTACAACGAGTTGCGAACTCGCGAGAGTAAGCTAATC   | 1261 |
| L.plantarum     | CTACACACGTGCTACAATGGATGGTACAACGAGTTGCGAACTCGCGAGAGTAAGCTAATC   | 1274 |
| L.panisi        | CTACACACGTGCTACAATGGCCGGTACAACGAGCAGCTAACCCGCGAGGGTGTGCAAAATC  | 1272 |
| L.curvatus      | CTACACACGTGCTACAATGGATGGTACAAC-----                            | 1252 |
| L.intestinalis  | CTACACACGTGCTACAATGGGCGAGTACAACGAGAAGCGAGCCTGCGAAGGCAAGCGGATC  | 1278 |
| L.crispatus     | CTACACACGTGCTACAATGGCCGGTACAACGAGAAGCGAGCCTGCGAAGGCAAGCGAATC   | 1305 |
| L.casei         | CTACACACGTGCTACAATGGATGGTACAACGAGTTGCGAGACCGCGAGGTCAAGCTAATC   | 1280 |
| L.kunkeei       | CTACACACGTGCTACAATGGATGGTACAACGAGTCGCGAAACCGCGAGGTCAAGCTAATC   | 1286 |
| L.zeae          | CTACACACGTGCTACAATGGATGGTACAACGAGTTGCGAGACCGCGAGGTCAAGCTAATC   | 1280 |
| L.salivarius    | CTACACACGTGCTACAATGGCCGGTACAACGAGTCGCGAGACCGCGAGGTTTAGCTAATC   | 1275 |
| Bacillus-lentus | CTACACACGTGCTACAATGGATGGTACAAGGGTTGCAAGACCGCGAGGTTTAGCTAATC    | 1283 |
|                 | *****                                                          |      |
| Lac             | TCTTAAAGCCATTCTCAGTTCGGATTGTAGGCTGCAACTCGCCTACATGAAGTCGGAATC   | 1321 |
| L.plantarum     | TCTTAAAGCCATTCTCAGTTCGGATTGTAGGCTGCAACTCGCCTACATGAAGTCGGAATC   | 1334 |
| L.panisi        | TCTTAAAGCCGGTCTCAGTTCGGACTGCAGTCTGCAACTCGACTGCACGAAGTCGGAATC   | 1332 |
| L.curvatus      | -----                                                          |      |
| L.intestinalis  | TCTTAAAGCTGTTCTCAGTTCGGACTGCAGTCTGCAACTCGACTGTACGAAGCTGGAATC   | 1338 |
| L.crispatus     | TCTGAAAGCTGTTCTCAGTTCGGACTGCAGTCTGCAACTCGACTGCACGAAGCTGGAATC   | 1365 |
| L.casei         | TCTTAAAGCCATTCTCAGTTCGGACTGTAGGCTGCAACTCGCCTACACGAAGTCGGAATC   | 1340 |
| L.kunkeei       | TCTTAAAGCCATTCTCAGTTCGGATTGCAGGCTGCAACTCGCCTGCATGAAGTTGGAATC   | 1346 |
| L.zeae          | TCTTAAAGCCATTCTCAGTTCGGACTGTAGGCTGCAACTCGCCTACACGAAGTCGGAATC   | 1340 |
| L.salivarius    | TCTTAAAGCCGTTCTCAGTTCGGATTGTAGGCTGCAACTCGCCTACATGAAGTCGGAATC   | 1335 |
| Bacillus-lentus | CCATAAAACCATTTCTCAGTTCGGATTGCAGGCTGCAACTCGCCTGCATGAAGCCGGAATC  | 1343 |
|                 |                                                                |      |
| Lac             | GCTAGTAATCGCGGATCAGCATGCCGCGGTGAATACGTTCCCGGGCCTTGTACACACCGC   | 1381 |
| L.plantarum     | GCTAGTAATCGCGGATCAGCATGCCGCGGTGAATACGTTCCCGGGCCTTGTACACACCGC   | 1394 |
| L.panisi        | GCTAGTAATCGCGGATCAGCATGCCGCGGTGAATACGTTCCCGGGCCTTGTACACACCGC   | 1392 |
| L.curvatus      | -----                                                          |      |
| L.intestinalis  | GCTAGTAATCGCGGATCAGCACGCCGCGGTGAATACGTTCCCGGGCCTTGTACACACCGC   | 1398 |
| L.crispatus     | GCTAGTAATCGCGGATCAGCACGCCGCGGTGAATACGTTCCCGGGCCTTGTACACACCGC   | 1425 |
| L.casei         | GCTAGTAATCGCGGATCAGCACGCCGCGGTGAATACGTTCCCGGGCCTTGTACACACCGC   | 1400 |
| L.kunkeei       | ACTAGTAATCGTGGATCAGCATGCCACGGTGAATACGTTCCCGGGCCTTGTACACACCGC   | 1406 |
| L.zeae          | GCTAGTAATCGCGGATCAGCACGCCGCGGTGAATACGTTCCCGGGCCTTGTACACACCGC   | 1400 |
| L.salivarius    | GCTAGTAATCGCGAATCAGCATGTCGCGGTGAATACGTTCCCGGGCCTTGTACACACCGC   | 1395 |
| Bacillus-lentus | GCTAGTAATCGTGGATCAGCATGCCACGGTGAATACGTTCCCGGGCCTTGTACACACCGC   | 1403 |
|                 |                                                                |      |
| Lac             | CCGTCACACCATGAGAGTTTGTAAACACCCAAAGTCGGTGGGGTAACCTTTTA--GGAACC  | 1439 |
| L.plantarum     | CCGTCACACCATGAGAGTTTGTAAACACCCAAAGTCGGTGGGGTAACCTTTTA--GGAACC  | 1452 |
| L.panisi        | CCGTCACACCATGGAAGTTTGTAAATGCCCAAAGTCAGTGGCCTAACCATTTG---GAGGG  | 1449 |
| L.curvatus      | -----                                                          |      |
| L.intestinalis  | CCGTCACACCATGGAAGTCTGCAATGCCCAAGCCGGTGGCCTAACCACTTATGTGGAAG    | 1458 |
| L.crispatus     | CCGTCACACCATGGGAGTCTGCAATGCCCAAGCCGGTGGGATAACC--TTTATAGGAGTC   | 1484 |
| L.casei         | CCGTCACACCATGAGAGTTTGTAAACACCCAAAGCCGGTGGCCTAACCTTTTAGGGAGCC   | 1460 |
| L.kunkeei       | CCGTCACACCATGAGAGTTTGTAAACACCCAAAGACGATGGGGTAACCTTTTA--GGAGTC  | 1464 |
| L.zeae          | CCGTCACACCATGAGAGTTTGTAAACACCCAAAGCCGGTGGCCTAACCTTTTAGGGAGCC   | 1460 |
| L.salivarius    | CCGTCACACCATGAGAGTTTGTAAACACCCAAAGCCGGTGGGGTAACCGC---AAGGAGCC  | 1452 |
| Bacillus-lentus | CCGTCACACCATGAGAGTTTGTAAACACCCAAAGTCGGTGGGGTAACC--CTTACGGGAGCC | 1462 |

|                 |                                                               |      |
|-----------------|---------------------------------------------------------------|------|
| Lac             | AGCCGCCTAAG-----                                              | 1450 |
| L.plantarum     | AGCCGCCTAAG-----                                              | 1464 |
| L.panis         | AGCTGCCTAAGGCAGGACAGATGACTGGGGTGAAGTCGTAA-----                | 1490 |
| L.curvatus      | -----                                                         |      |
| L.intestinalis  | AGCCGTCTAAGGCAGGCAGATGACTGGGGTGAAGTCGTAAACAAGGTAGCCGTAG-----  | 1513 |
| L.crispatus     | AGCCGTCTAAGGTAGGACAGATGATTAGGGTGAAGTCGTGACAAGGTAGCCGTAG-----  | 1539 |
| L.casei         | AGCCGTCTAAGGTGGGACAAATGATTAGGGTGAAGTCGTAAACAAGGTAGCCGTAGGAGAA | 1520 |
| L.kunkeei       | AGTCGTCTAAGGTGGGACAGATGATTAGGGTGAAGTCGTAAACAAGGTAGCCGT-----   | 1517 |
| L.zeae          | AGCCGTCTAAGGTGGGACAAATGATTAGGGTGAAGTCGTAAACAAGGTAGCCGTAGGAGAA | 1520 |
| L.salivarius    | AGCCGTCTAAGGTGGGACAGATGATTGGGGTGAAGTCGTAAACAAGGTAGCCGTAGGAGAA | 1512 |
| Bacillus-lentus | AGCCGCCGAAGGTGGGACAGATGATTGGGGTGAAGTCGTAAACAAGGTAGC-GTATCGGAA | 1521 |

|                 |                |      |
|-----------------|----------------|------|
| Lac             | -----          |      |
| L.plantarum     | -----          |      |
| L.panis         | -----          |      |
| L.curvatus      | -----          |      |
| L.intestinalis  | -----          |      |
| L.crispatus     | -----          |      |
| L.casei         | CC-----        | 1522 |
| L.kunkeei       | -----          |      |
| L.zeae          | CC-----        | 1522 |
| L.salivarius    | CCTGC-----     | 1517 |
| Bacillus-lentus | GGTGCGGTGGATCA | 1535 |

## Phylogenetic Tree

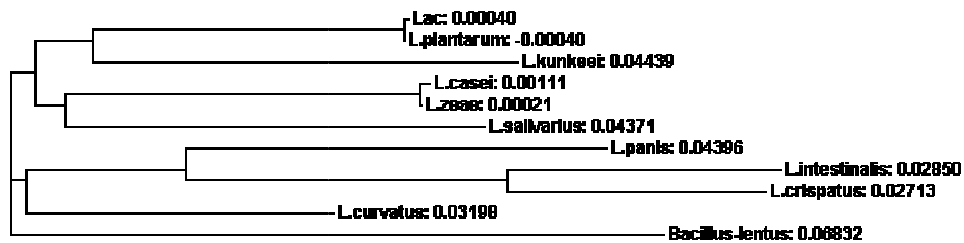

## Lineage:

Root; domain Bacteria; phylum Firmicutes; class Bacilli; order Lactobacillales; family Lactobacillaceae; genus Lactobacillus

*Bacillus lentus* (outgroup: AB021189); *Lactobacillus curvatus* (AJ270951); *Lactobacillus crispatus* (AJ242969); *Lactobacillus intestinalis* (AJ306299); *Lactobacillus panis* (X94230); *Lactobacillus salivarius* (AF335475); *Lactobacillus zeae* (D86516); *Lactobacillus casei* (D16551); *Lactobacillus kunkeei* (Y11374); *Lactobacillus plantarum* (JQ340030); Lac (query sequence).
