# Supplementary material for: Biotransformation of Momordica charantia fresh juice by Lactobacillus plantarum BET003 and its putative anti-diabetic potential
Source: PeerJ. 2015 Oct 29;3:e1376. doi: 10.7717/peerj.1376 (PMC4631465; doi:10.7717/peerj.1376)
Supplement: Supplemental Information 2 [file peerj-03-1376-s002.xlsx]

## Sheet: Enzyme activity
Time (h)	Beta-glucosidase activity (U/mL)	SE
0	0.023	0.00094
4	0.0302	0.0018
8	0.0443	0.00086
12	0.0281	0.001
16	0.0282	0.00204
20	0.0286	0.00054
24	0.028	0.00059

## Sheet: Shake flask fermentation
Experiment 1
Time (h)	Glucose concentration (g/L)	pH	CFU/mL
0	5.43	5.5	277000000
4	4.6	3.86	2600000000
8	4.03	2.5	3180000000
12	3.86	2.47	537500000000
16	3.76	2.47	2150000000000
20	3.89	2.46	230000000000
24	3.94	2.49	29000000000
Experiment 2
Time (h)	Glucose concentration (g/L)	pH	CFU/mL
0	5.46	5.6	619000000
4	4.62	4.8	3930000000
8	4.23	3.88	627000000000
12	3.96	2.6	644000000000
16	3.82	2.56	2990000000000
20	3.79	2.5	1740000000000
24	3.81	2.5	646000000000
Experiment 3
Time (h)	Glucose concentration (g/L)	pH	CFU/mL
0	5.57	5.35	159000000
4	4.39	4.58	3000000000
8	3.93	2.64	23800000000
12	3.95	2.51	1140000000000
16	3.97	2.5	2410000000000
20	3.98	2.52	807000000000
24	4	2.51	227000000000

## Sheet: Growth profiles BET003
Experiment 1
Time (h)	Biomass concentration (g/L)	SE
0	0.097	0.008436
4	1.49	0.0957
8	3.06	0.1148
12	3.88	0.0785
16	3.66	0.2662
20	3.47	0.3348
24	3.24	0.1515
Experiment 2
Time (h)	Biomass concentration (g/L)	SE
0	0.34	0.0126
4	1.92	0.0314
8	3.51	0.1166
12	4.35	0.0885
16	4.33	0.2005
20	4	0.1804
24	4.54	0.1549
Experiment 3
Time (h)	Biomass concentration (g/L)	SE
0	0.3	0.0179
4	1.65	0.061
8	3.02	0.0399
12	4.4	0.2216
16	4.28	0.0818
20	4.15	0.105
24	3.75	0.0665

## Sheet: Growth profiles for 4 strains
Strains	BET012		BET003		BET028		BET022
Time (h)	Biomass concentration (g/L)	SE	Biomass concentration (g/L)	SE	Biomass concentration (g/L)	SE	Biomass concentration (g/L)	SE
0	0.1944	0.0143	0.097	0.008436	0.2369	0.0388	0.2111	0.0516
4	1.2407	0.0137	1.49	0.0957	1.1609	0.0104	1.1212	0.0446
8	2.1321	0.0158	3.06	0.1148	2.3501	0.0133	1.5501	0.0376
12	2.5658	0.0543	3.88	0.0785	3.3418	0.004236	3.4086	0.0214
16	2.9582	0.0103	3.66	0.2662	3.475	0.0254	3.6877	0.0291
20	3.0501	0.0158	3.47	0.3348	2.4451	0.0212	3.9165	0.0485
24	2.5548	0.0113	3.24	0.1515	2.7703	0.0104	3.2928	0.0274

## Sheet: Optimization of fermentation
Optimization of fermentation
200 rpm 10 mL
Time (h)	CFU/mL	SD	Glucose concentration (g/L)	SD	pH
0	177000000	1730000	4.81	0.0723	5.88
4	5160000000	509000000	4.32	0.0427	5.33
8	1220000000000	2830000000	3.4	0.033	4.46
12	3520000000000	345000000000	2.71	0.0165	4.05
16	6940000000000	222000000000	2.6	0.0984	4.04
20	1610000000000	290000000000	2.7	0.0881	4.04
24	53000000000	7000000000	2.83	0.0444	4.03
200 rpm 50 mL
Time (h)	CFU/mL	SD	Glucose concentration (g/L)	SD	pH
0	6070000000	2690000000	3.68	0.013	5.67
4	34800000000	3000000000	2.94	0.0635	4.65
8	75500000000	707000000	2.7	0.0646	4.16
12	917000000000	195000000000	2.71	0.0898	4.15
16	1390000000000	120000000000	2.55	0.0569	4.12
20	1280000000000	60300000000	2.66	0.0617	4.12
24	807000000000	190000000000	2.61	0.0098	4.12
200 rpm 100 mL
Time (h)	CFU/mL	SD	Glucose concentration (g/L)	SD	pH
0	823000000000	121000000000	4.45	0.2694	5.73
4	14400000000000	2120000000000	2.73	0.0728	4.43
8	47700000000000	2830000000000	2.54	0.019	4.15
12	6930000000000	919000000000	2.43	0.0921	4.13
16	11100000000000	1130000000000	2.53	0.025	4.14
20	6400000000000	141000000000	2.5	0.0384	4.14
24	810000000000	42400000000	2.58	0.1315	4.14
300rpm 10 mL
Time (h)	CFU/mL	SD	Glucose concentration (g/L)	SD	pH
0	2700000000	283000000	5.5438	0.0651	5.85
4	17000000000	1000000000	5.7141	0.0416	5.41
8	193000000000	32100000000	5.4079	0.0817	5.2
12	5570000000000	737000000000	4.8615	0.2948	4.9
16	103000000000000	13500000000000	3.7256	0.1302	4.31
20	28700000000000	2520000000000	2.9954	0.0776	4.1
24	30800000000000	1060000000000	2.6688	0.0304	4.04
300 rpm 50mL (Exp1)
Time (h)	CFU/mL	SD	Glucose concentration (g/L)	SD	pH
0	63400000000	1570000000	4.1796	0.055	5.72
4	118000000000	11300000000	3.308	0.033	4.58
8	1470000000000	51300000000	2.66	0.091	4.13
12	46400000000000	2400000000000	2.789	0.0144	4.13
16	51300000000000	1420000000000	2.749	0.0335	4.11
20	37600000000000	1350000000000	2.61	0.0387	4.1
24	2410000000000	142000000000	2.574	0.0518	4.11
300 rpm 50mL (Exp2)
Time (h)	CFU/mL	SD	Glucose concentration (g/L)	SD	pH
0	139000000000	130000000000	4.79	0.0977	5.84
4	1500000000000	214000000000	5.68	0.0764	4.89
8	26400000000000	3040000000000	3.65	0.2061	4.33
12	533000000000000	707000000000	3.05	0.0963	4.19
16	74000000000000	3890000000000	2.58	0.0693	4.19
20	45700000000000	6350000000000	2.63	0.0674	4.19
24	6660000000000	56900000000	3.08	0.0926	4.2
300 rpm 50mL (Exp3)
Time (h)	CFU/mL	SD	Glucose concentration (g/L)	SD	pH
0	25300000000	1530000000	4.81	0.0723	6.24
4	5200000000000	179000000000	4.32	0.0427	4.47
8	1040000000000000	80500000000000	3.4	0.033	4.01
12	983000000000000	36500000000000	2.71	0.0165	4.02
16	689000000000000	14100000000000	2.6	0.0984	4.03
20	654000000000000	15600000000000	2.7	0.0881	4.03
24	618000000000000	5660000000000	2.83	0.0444	4.04
300 rpm 50mL (Exp4)
Time (h)	CFU/mL	SD	Glucose concentration (g/L)	SD	pH
0	346000000000	22600000000	4.79	0.0977	5.68
4	1960000000000	311000000000	4.68	0.0764	4.52
8	152000000000000	10400000000000	3.65	0.2061	3.92
12	104000000000000	20500000000000	3.05	0.0963	3.83
16	81000000000000	12700000000000	2.58	0.0693	3.84
20	73500000000000	4950000000000	2.63	0.0674	3.84
24	36500000000000	707000000000	3.08	0.0926	3.84
300 rpm 100mL
Time (h)	CFU/mL	SD	Glucose concentration (g/L)	SD	pH
0	2930000000000	219000000000	6.5141	0.36085	5.74
4	15500000000000	2070000000000	6.6044	0.27163	4.46
8	174000000000000	24100000000000	3.424	0.11086	4.06
12	403000000000000	28300000000000	2.6504	0.07516	4.02
16	86500000000000	0.7071	2.6017	0.06638	4.03
20	17800000000000	2830000000000	2.6508	0.1236	4.03
24	25100000000000	495000000000	2.3273	0.059	4.04
400 rpm 10mL
Time (h)	CFU/mL	SD	Glucose concentration (g/L)	SD	pH
0	2380000000	163000000	4.6	0.4629	5.73
4	7100000000	931000000	4.39	0.3035	5.19
8	72000000000	8490000000	3.65	0.2673	4.41
12	85400000000000	9760000000000	2.63	0.0126	3.98
16	34000000000000	566000000000	2.45	0.0476	3.98
20	28400000000000	4990000000000	2.52	0.0623	3.94
24	4780000000000	113000000000	2.58	0.1315	3.96
400rpm 50mL
Time (h)	CFU/mL	SD	Glucose concentration (g/L)	SD	pH
0	299000000000	12700000000	3.28	0.2074	5.74
4	3380000000000	476000000000	3.14	0.1936	4.57
8	5450000000000000	771000000000000	2.78	0.1482	3.98
12	350000000000000	57500000000000	2.58	0.0383	3.94
16	131000000000000	22300000000000	2.58	0.0579	3.94
20	98000000000000	2820000000000	2.59	0.0327	3.94
24	40300000000000	7510000000000	2.45	0.0881	3.94
400rpm 100mL
Time (h)	CFU/mL	SD	Glucose concentration (g/L)	SD	pH
0	712000000000	21900000000	4.28	0.2381	5.65
4	3300000000000	453000000000	2.83	0.0574	4.22
8	67500000000000	10500000000000	2.71	0.0302	4
12	17500000000000	2440000000000	2.58	0.1582	3.99
16	3450000000000	517000000000	2.58	0.0206	4
20	2870000000000	230000000000	2.6	0.0716	4
24	1110000000000	75700000000	2.52	0.061	4
